# Supplementary material
Source: PubMed Central journal article supplement (PMC2211415)
Supplement: NIHMS36184-supplement-01.pdf [file NIHMS36184-supplement-01.pdf]

## Supplemental Data

## Trm9-Catalyzed tRNA Modifications

## Link Translation to the DNA Damage Response

Ulrike Begley, Madhu Dyavaiah, Ashish Patil, John P. Rooney, Dan DiRenzo,  
Christine M. Young, Douglas S. Conklin, Richard S. Zitomer, and Thomas J. Begley

Table S2. Group 1 Codon Usage Statistics

| Amino Acid | Codon | Group 1 Average | 421 Random Average | Standard Deviation | Group Codon Z Score |
|------------|-------|-----------------|--------------------|--------------------|---------------------|
| Ala        | GCA   | 0.09            | 0.30               | 0.007              | -29.75              |
| Ala        | GCG   | 0.02            | 0.12               | 0.005              | -20.79              |
| Ala        | GCC   | 0.29            | 0.22               | 0.006              | 10.89               |
| Ala        | GCU   | 0.61            | 0.36               | 0.008              | 32.41               |
| Arg        | AGG   | 0.04            | 0.21               | 0.006              | -26.53              |
| Arg        | CGA   | 0.00            | 0.07               | 0.004              | -16.35              |
| Arg        | CGG   | 0.00            | 0.04               | 0.003              | -12.87              |
| Arg        | CGC   | 0.01            | 0.06               | 0.004              | -12.45              |
| Arg        | CGU   | 0.19            | 0.14               | 0.006              | 7.84                |
| Arg        | AGA   | 0.76            | 0.48               | 0.009              | 30.98               |
| Asn        | AAU   | 0.25            | 0.57               | 0.009              | -35.41              |
| Asn        | AAC   | 0.74            | 0.43               | 0.009              | 35.14               |
| Asp        | GAU   | 0.49            | 0.63               | 0.008              | -16.79              |
| Asp        | GAC   | 0.51            | 0.37               | 0.008              | 16.79               |
| Cys        | UGC   | 0.13            | 0.37               | 0.014              | -17.88              |
| Cys        | UGU   | 0.83            | 0.61               | 0.014              | 15.72               |
| End        | UGA   | 0.11            | 0.30               | 0.021              | -8.72               |
| End        | UAG   | 0.16            | 0.23               | 0.019              | -3.65               |
| End        | UAA   | 0.73            | 0.48               | 0.023              | 10.93               |
| Gln        | CAG   | 0.07            | 0.31               | 0.009              | -27.68              |
| Gln        | CAA   | 0.93            | 0.68               | 0.009              | 27.73               |
| Glu        | GAG   | 0.11            | 0.31               | 0.007              | -26.25              |
| Glu        | GAA   | 0.89            | 0.69               | 0.008              | 25.90               |
| Gly        | GGA   | 0.04            | 0.23               | 0.007              | -27.08              |
| Gly        | GGG   | 0.02            | 0.13               | 0.005              | -20.66              |
| Gly        | GGC   | 0.08            | 0.21               | 0.007              | -19.69              |
| Gly        | GGU   | 0.86            | 0.43               | 0.010              | 43.39               |
| His        | CAU   | 0.41            | 0.62               | 0.011              | -18.63              |
| His        | CAC   | 0.59            | 0.37               | 0.011              | 18.92               |
| Ile        | AUA   | 0.03            | 0.28               | 0.008              | -32.15              |
| Ile        | AUU   | 0.48            | 0.45               | 0.007              | 5.08                |
| Ile        | AUC   | 0.48            | 0.27               | 0.007              | 29.67               |
| Leu        | CUG   | 0.03            | 0.11               | 0.004              | -23.31              |
| Leu        | CUU   | 0.04            | 0.13               | 0.004              | -21.28              |
| Leu        | CUC   | 0.01            | 0.06               | 0.003              | -17.93              |
| Leu        | CUA   | 0.10            | 0.14               | 0.003              | -12.01              |
| Leu        | UUA   | 0.22            | 0.26               | 0.005              | -8.25               |
| Leu        | UUG   | 0.60            | 0.29               | 0.007              | 45.87               |
| Lys        | AAA   | 0.30            | 0.57               | 0.008              | -34.18              |
| Lys        | AAG   | 0.70            | 0.43               | 0.008              | 34.18               |
| Phe        | UUU   | 0.29            | 0.57               | 0.009              | -31.00              |
| Phe        | UUC   | 0.71            | 0.43               | 0.009              | 31.15               |
| Pro        | CCC   | 0.03            | 0.16               | 0.006              | -21.29              |
| Pro        | CCG   | 0.01            | 0.12               | 0.006              | -19.13              |
| Pro        | CCU   | 0.17            | 0.30               | 0.007              | -17.69              |
| Pro        | CCA   | 0.78            | 0.41               | 0.009              | 39.18               |
| Ser        | UCA   | 0.09            | 0.20               | 0.005              | -23.33              |
| Ser        | AGU   | 0.06            | 0.16               | 0.004              | -22.56              |
| Ser        | UCG   | 0.02            | 0.10               | 0.003              | -21.50              |
| Ser        | AGC   | 0.04            | 0.12               | 0.004              | -18.26              |
| Ser        | UCC   | 0.32            | 0.17               | 0.005              | 30.54               |
| Ser        | UCU   | 0.47            | 0.26               | 0.006              | 35.55               |
| Thr        | ACA   | 0.09            | 0.30               | 0.007              | -30.06              |
| Thr        | ACG   | 0.02            | 0.14               | 0.005              | -23.31              |
| Thr        | ACU   | 0.49            | 0.34               | 0.007              | 21.87               |
| Thr        | ACC   | 0.40            | 0.22               | 0.007              | 26.97               |
| Tyr        | UAU   | 0.24            | 0.55               | 0.010              | -29.89              |
| Tyr        | UAC   | 0.76            | 0.45               | 0.010              | 30.00               |
| Val        | GUA   | 0.04            | 0.22               | 0.006              | -28.30              |
| Val        | GUG   | 0.06            | 0.20               | 0.006              | -23.67              |
| Val        | GUU   | 0.53            | 0.37               | 0.007              | 22.33               |
| Val        | GUC   | 0.37            | 0.21               | 0.006              | 27.80               |

Boxes shaded yellow correspond to over-represented codons, while those shaded in purple correspond to under-represented codons.

**Table S3. Functional Categories Over-Represented in Group 1 Proteins**

| <b>Biological Theme</b>           | <b>Process</b>                     | <b>p-value</b> |
|-----------------------------------|------------------------------------|----------------|
| <b>Protein Production</b>         | Ribosome Biogenesis                | 1.0E-14        |
|                                   | Protein Synthesis                  | 3.4E-14        |
|                                   | Aminoacyl-tRNA-Synthetases         | 5.3E-12        |
|                                   | Amino Acid Biosynthesis            | 6.6E-10        |
|                                   | Translation                        | 2.3E-09        |
|                                   | Amino Acid Metabolism              | 8.3E-06        |
| <b>Energy and Metabolism</b>      | Metabolism                         | 2.5E-14        |
|                                   | Glycolysis and Gluconeogenesis     | 1.0E-13        |
|                                   | Nucleotide Metabolism              | 1.5E-06        |
|                                   | Energy                             | 1.6E-06        |
|                                   | Carbohydrate Metabolism            | 1.8E-06        |
|                                   | Homeostasis of Protons             | 8.2E-04        |
|                                   | Phosphate Metabolism               | 9.2E-04        |
| <b>Damage and Stress Response</b> | Stress Response                    | 3.6E-06        |
|                                   | Cell Rescue, Defense and Virulence | 1.5E-05        |
|                                   | Purine Ribonucleotide Metabolism   | 4.5E-05        |
|                                   | Cell Wall                          | 5.1E-05        |
|                                   | Deoxyribonucleotide Metabolism     | 2.9E-03        |
|                                   | Transport                          | 3.8E-03        |

**Table S4. Codon Usage Numbers for Some Group 1 Genes**

| <b>Gene Name</b> | <b>Arg<sup>AGA</sup></b> | <b>Arg<sup>AGG</sup></b> | <b>Glu<sup>GAA</sup></b> | <b>Glu<sup>GAG</sup></b> |
|------------------|--------------------------|--------------------------|--------------------------|--------------------------|
| <i>YEF3</i>      | 41                       | 0                        | 91                       | 1                        |
| <i>RNR1</i>      | 18                       | 1                        | 44                       | 14                       |
| <i>RNR2</i>      | 13                       | 0                        | 34                       | 11                       |
| <i>RNR3</i>      | 15                       | 2                        | 44                       | 14                       |
| <i>RNR4</i>      | 7                        | 0                        | 31                       | 2                        |
| <i>PAB1</i>      | 14                       | 0                        | 42                       | 7                        |
| Expected Ratio   | 2.3 to 1                 |                          | 2.3 to 1                 |                          |

**Table S5. Strains and Oligonucleotides**

| <b>Strain</b>                                                            | <b>Genotype</b>                                                                    |
|--------------------------------------------------------------------------|------------------------------------------------------------------------------------|
| <i>BY4741</i> (Open Biosystems)                                          | <i>MATa his3Δ1 leu2Δ0 met15Δ0 ura3Δ0</i>                                           |
| <i>Yml014w</i> (Open Biosystems)                                         | <i>MATa his3Δ1 leu2Δ0 met15Δ0 ura3Δ0 trm9Δ G418</i>                                |
| <i>CenPK2-1C</i> (Kahlor and Clark, 2003)                                | <i>MAT ura3 his3 leu2 trp1</i>                                                     |
| <i>HKY102</i> (Kahlor and Clark, 2003)                                   | <i>CEN.PK2-1c trm9::TRP1</i>                                                       |
| <i>BY4743</i> (Open Biosystems)                                          | <i>MATa his3Δ1 leu2Δ0 met15Δ0 ura3Δ0 / MATalpha his3Δ1 leu2Δ0 lys2Δ0 ura3Δ0</i>    |
| <i>20559</i> (Open Biosystems)                                           | Heterozygous Diploid Knockout for <i>trm9Δ</i> in <i>BY4743</i>                    |
| <i>30559</i> (Open Biosystems)                                           | Homozygous Diploid Knockout for <i>trm9Δ</i> in <i>BY4743</i>                      |
| <i>ATCC 201388</i> (TAP tag parent strain, Ghaemmaghami S, et al., 2003) | <i>MATa his3 Δ1 leu2 Δ0 met15 Δ0 ura3 Δ0</i>                                       |
|                                                                          |                                                                                    |
| <b>Oligonucleotides</b>                                                  | <b>Sequence</b>                                                                    |
| 10X AGA codon up primer                                                  | ATGATGATGGTACCT AGA AGA AGA AGA AGA AGA AGA AGA AGA AGA<br>CCTAAGGATCAGCTTGGAGTTGA |
| 10X AGG codon up primer                                                  | ATGATGATGGTACCT AGG AGG AGG AGG AGG AGG AGG AGG AGG AGG<br>CCTAAGGATCAGCTTGGAGTTGA |
| 10X GAA codon up primer                                                  | ATGATGATGGTACCTGAAGAAGAAGAAGAAGAAGAAGAAGAAGAACAACCTAAGGATCAGC<br>TTGGAGTTGA        |
| 5X AGG up primer                                                         | ATGATGATGGTACCT AGG AGG AGG AGG AGG CCTAAGGATCAGCTTGGAGTTGA                        |
| Reporter down primer (lacZ bot)                                          | GCTGGATATCTGCAGAATTCG                                                              |
| pYES Trm9 up primer                                                      | ATT CCG CTC GAG TCA TCT CTT CTG GGC CAC CA                                         |
| pYES Trm9 down primer                                                    | CGC AGG ATC CAG ATG GAG ATA AAC CAA GCG GCT                                        |
| pRS416 Trm9 up primer                                                    | CGGGATCCCGTTGTGTTTGTCTGTTGTAATG                                                    |
| pRS416 Trm9 down primer                                                  | ATCAGTCGAGCTCGGAAAGGGGTTACCATCATAAC                                                |
| RNR1 up primer                                                           | CGCAGG TAC CTA TGT ACG TTT ATA AAA GAG ACG GTC                                     |
| RNR1 down primer                                                         | TGC AGC TCG AGA ACC CGA ACA CAT TTC ACA AG                                         |
| RNR3 up primer                                                           | CAGTGAATCGTATGTACGTTATTAAA AGA GAC GGC                                             |
| RNR3 down primer                                                         | GAC ATC TCG AGA ACC GGA ACA TGA CTC ACA A                                          |

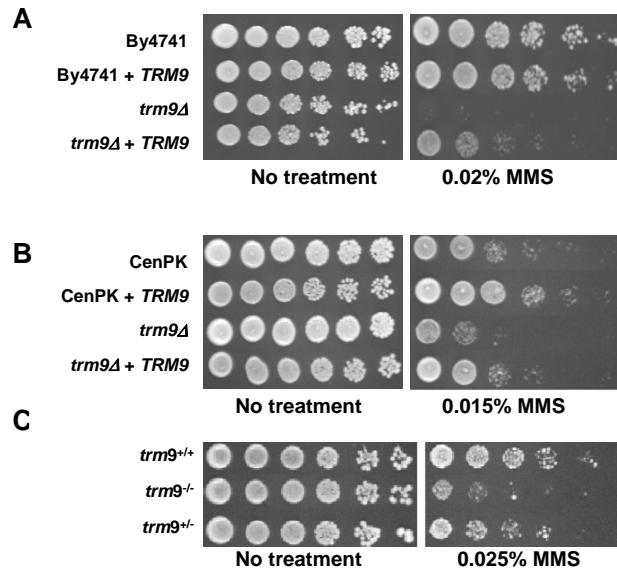

**Figure S1. Haploid and Diploid *trm9Δ* Cells are Sensitive to MMS**

**(A)** The MMS-sensitivity of *trm9Δ* cells in the haploid By4741 background was complemented by over-expression of *TRM9* from pYES2.0-*TRM9*. Cultures were grown overnight in SD-URA and then serially diluted onto YP-galactose plates. **(B)** The MMS-sensitivity of *trm9* insertion mutants in the haploid CenPK2 background was complemented by the expression of *TRM9*, under the control of its own promoter, from pRS416-*TRM9*. Cultures were grown overnight in SD-TRP and then serially diluted onto YPD plates. **(C)** Heterozygous and homozygous deficient *trm9Δ* cells from the By4743 diploid background were assayed for MMS sensitivity. Overnight cultures were grown in YPD and then serially diluted onto YPD plates. All plates were imaged 3-5 days after spotting.

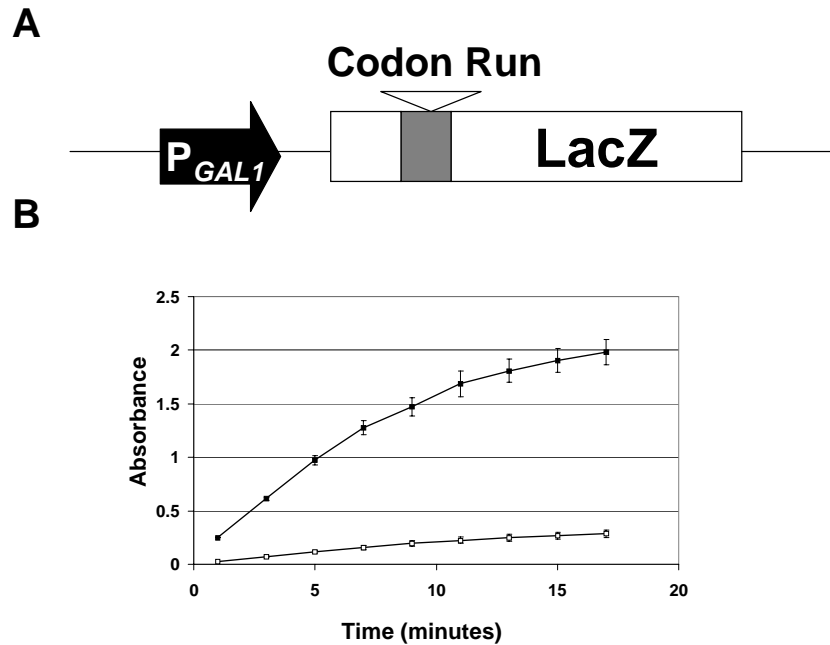

**Figure S2. Trm9 Enhances the Activity of Codon-Specific Reporters**

**(A)** Codon runs (none, 10X AGA, 10X AGG, and 5X AGG) were cloned in frame with *lacZ*, in pYESNT/LacZ, and the reporter was transcriptionally induced using a strong galactose inducible *GAL1* promoter. **(B)** Time course of  $\beta$ -galactosidase activity for the 10X GAA in wild-type (closed squares) and *trm9Δ* (open squares) cells. Absorbance at 410 nm. The 10X GAA reporter was expressed from pYES-10XGAA-lacZ.

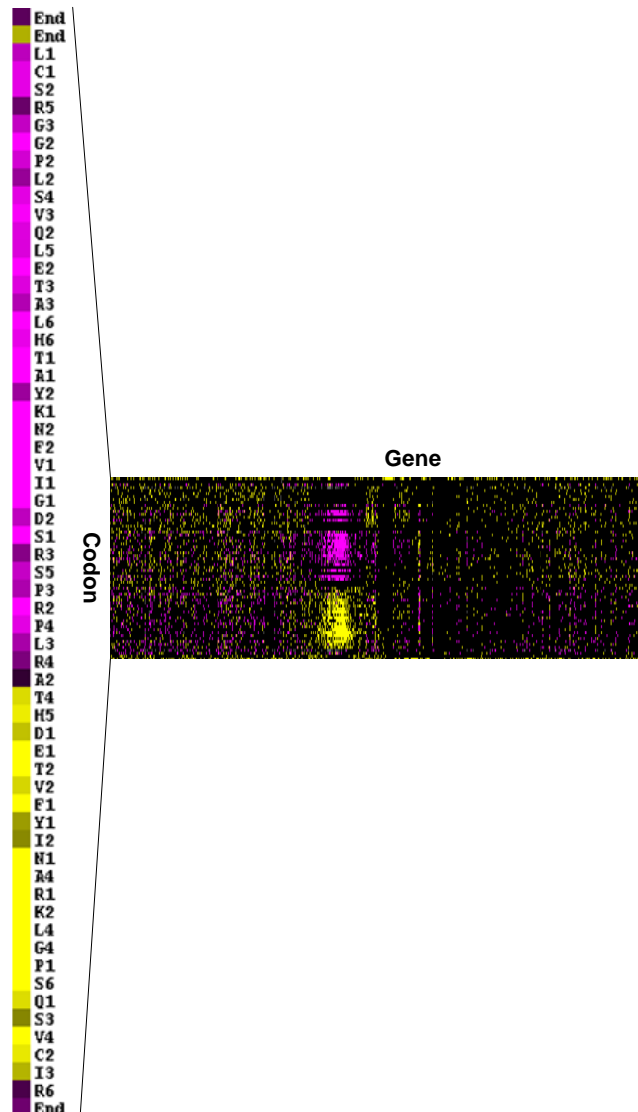

**Figure S3. Heat Map of Significant GSCU Z-Scores**

Hierarchical clustering and heat map analysis of all GSCU data for 5,783 *S. cerevisiae* genes. Z-scores greater than 1.5 ( $p < 0.067$ ) are displayed in yellow, Z-scores  $< -1.5$  are displayed in purple, and Z-scores between -1.5 and 1.5 are displayed as black. Note figure S3 has been rotated 90° clockwise to facilitate viewing of the codon axis and corresponds to figure 2A. A zoomed view of the codon key specific to the *YEF3* gene. A1, GCA (Ala), A2, GCC (Ala); A3, GCG (Ala); A4, GCT (Ala); R1, AGA (Arg); R2, AGG (Arg); R3, CGA (Arg); R4, CGC (Arg); R5, CGG (Arg); R6, CGT (Arg); N1, AAC (Asn); N2, AAT (Asn); D1, GAC (Asp); D2, GAT (Asp); C1, TGC (Cys); C2, TGT (Cys); Q1, CAA (Gln); Q2, CAG

(Gln); E1, GAA (Glu); E2, GAG (Glu); G1, GGA (Gly); G2, GGC (Gly); G3, GGG (Gly); G4, GGT (Gly); H5, CAC (His); H6, CAT (His); I1, ATA (Ile); I2, ATC (Ile); I3, ATT (Ile); L1, CTA (Leu); L2, TTA (Leu); L3, CTC (Leu); L4, TTG (Leu); L5, CTG (Leu); L6, CTT (Leu); K1, AAA (Lys); K2, AAG (Lys); F1, TTC (Phe); F2, TTT (Phe); P1, CCA (Pro); P2, CCC (Pro); P3, CCG (Pro); P4, CCT (Pro); S1, TCA (Ser); S2, AGC (Ser); S3, TCC (Ser); S4, TCG (Ser); S5, AGT (Ser); S6, TCT (Ser); T1, ACA (Thr); T2, ACC (Thr); T3, ACG (Thr); T4, ACT (Thr); Y1, TAC (Tyr); Y2, TAT (Tyr); V1, GTA (Val); V2, GTC (Val); V3, GTG (Val); V4, GTT (Val)



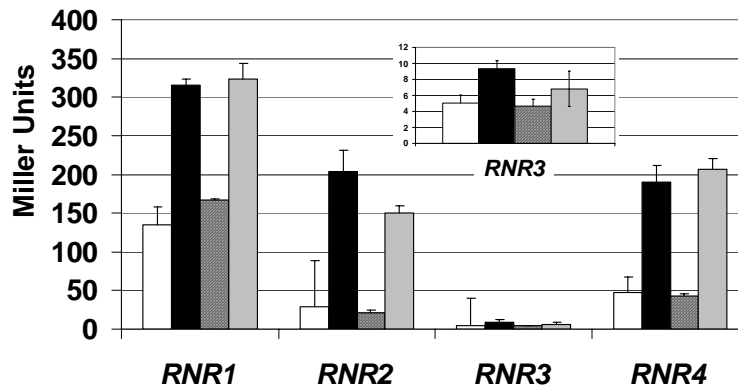

**Figure S4. *RNR* transcript Levels in Wild-type and *trm9Δ* Cells**

*lacZ* promoter fusion assays were used to quantitate the transcription of *RNR1*, *RNR2*, *RNR3*, and *RNR4* in wild-type and *trm9Δ* cells before and after MMS treatment.  $\beta$ -galactosidase activity was determined in untreated wild-type (white bars), MMS-treated wild-type (black bars), untreated *trm9Δ* (striped bars), and MMS-treated *trm9Δ* cells (gray bars). The *RNR* transcription reporters (YCp(33)*RNR1Z*, YCp(33)*RNR2Z*, YCp(33)*RNR3Z*, and YCp(33)*RNR4Z*) were transformed into wild-type (By4741) and *trm9Δ*, cells and assayed as described (Klinkenberg et al., 2006).

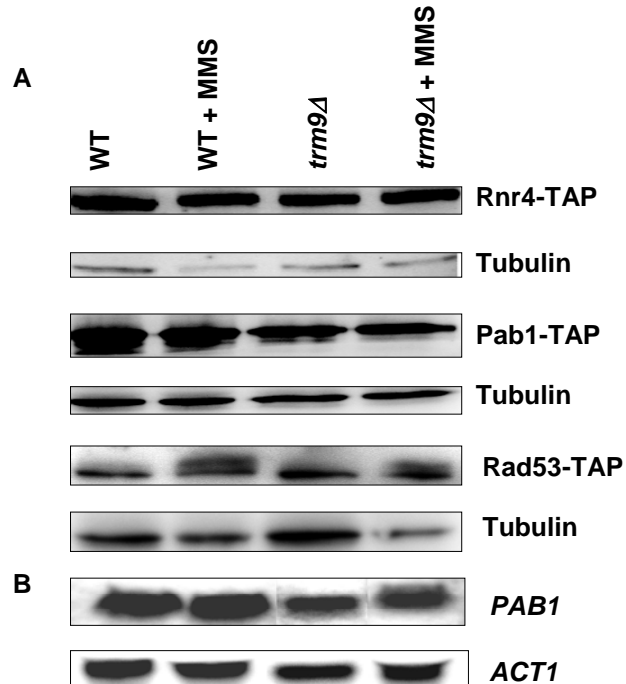

**Figure S5. Rnr4 and Pab1 Levels in Wild-type and *trm9Δ* Cells**

**(A)** Western blot analysis of endogenous Rnr4-TAP, Pab1-TAP, Rad53-TAP, and  $\beta$ -tubulin in wild-type and *trm9Δ* cells, before and after MMS-treatment. **(B)** Northern blot results for both cell types, before and after MMS-treatment, for the Trm9-influenced transcript *PAB1* and the loading control *ACT1*. Experiments were performed as described in Figure 2.
